# Supplementary material for: Controlled synthesis and structural modulation to boost intrinsic photocatalytic activity of BiVO4
Source: Royal Society of Chemistry journal article supplement (doi:10.1039/d1ce01700d), 2022-01-01
Supplement: d1ce01700d1.pdf [file d1ce01700d1.pdf]

## Supporting Information

### Controlled Synthesis and Structural Modulation to Boost Intrinsic Photocatalytic Activity of BiVO<sub>4</sub>

Santosh S. Patil,<sup>a</sup> Jaewon Lee,<sup>a</sup> Taewon Kim,<sup>a</sup> Lakshmana Reddy Nagappagari,<sup>b</sup> and Kiyoung Lee<sup>\*a</sup>

<sup>a</sup>*Department of Chemistry and Chemical Engineering, Inha University, 22212, Incheon, South Korea.*

<sup>b</sup>*Division of Advanced Materials Engineering, Research Center of Advanced Materials Development, Jeonbuk National University, Jeonju 54896, South Korea.*

\*Correspondence: [kiyoung@inha.ac.kr](mailto:kiyoung@inha.ac.kr) (K. L)

## Supporting Information S1

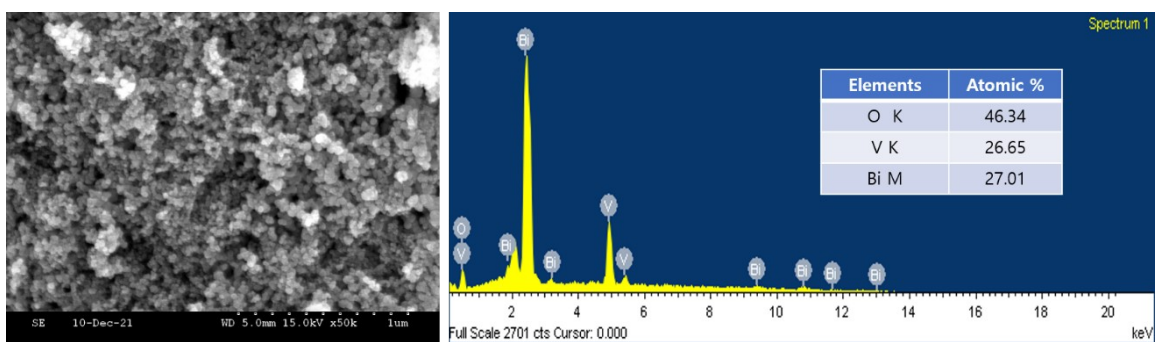

**Fig. S1.** FESEM image of a  $\text{BiVO}_4$  prior to the hydrothermal treatment and corresponding EDS elemental image.

## Supporting Information S2

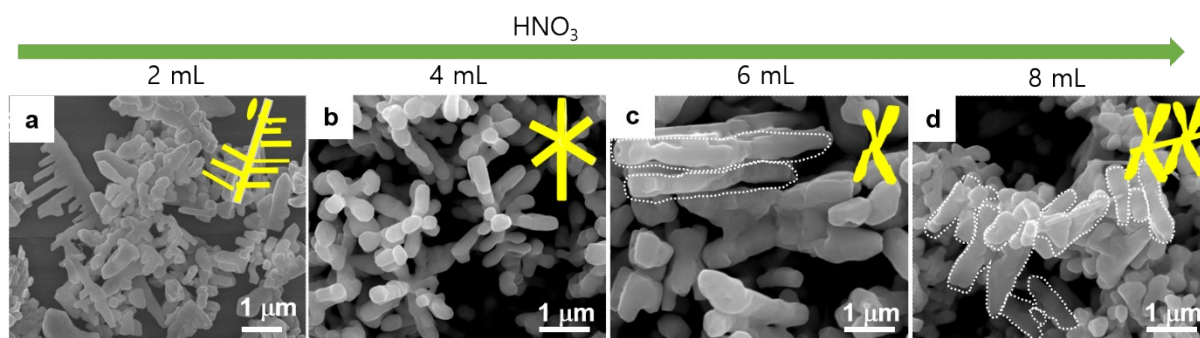

**Fig. S2.** FESEM image of a BVO-SLR'24 prepared with different content of  $\text{HNO}_3$  (a) 2 mL (b) 4 mL (c) 6 mL and (d) 8 mL.

### Supporting Information S3

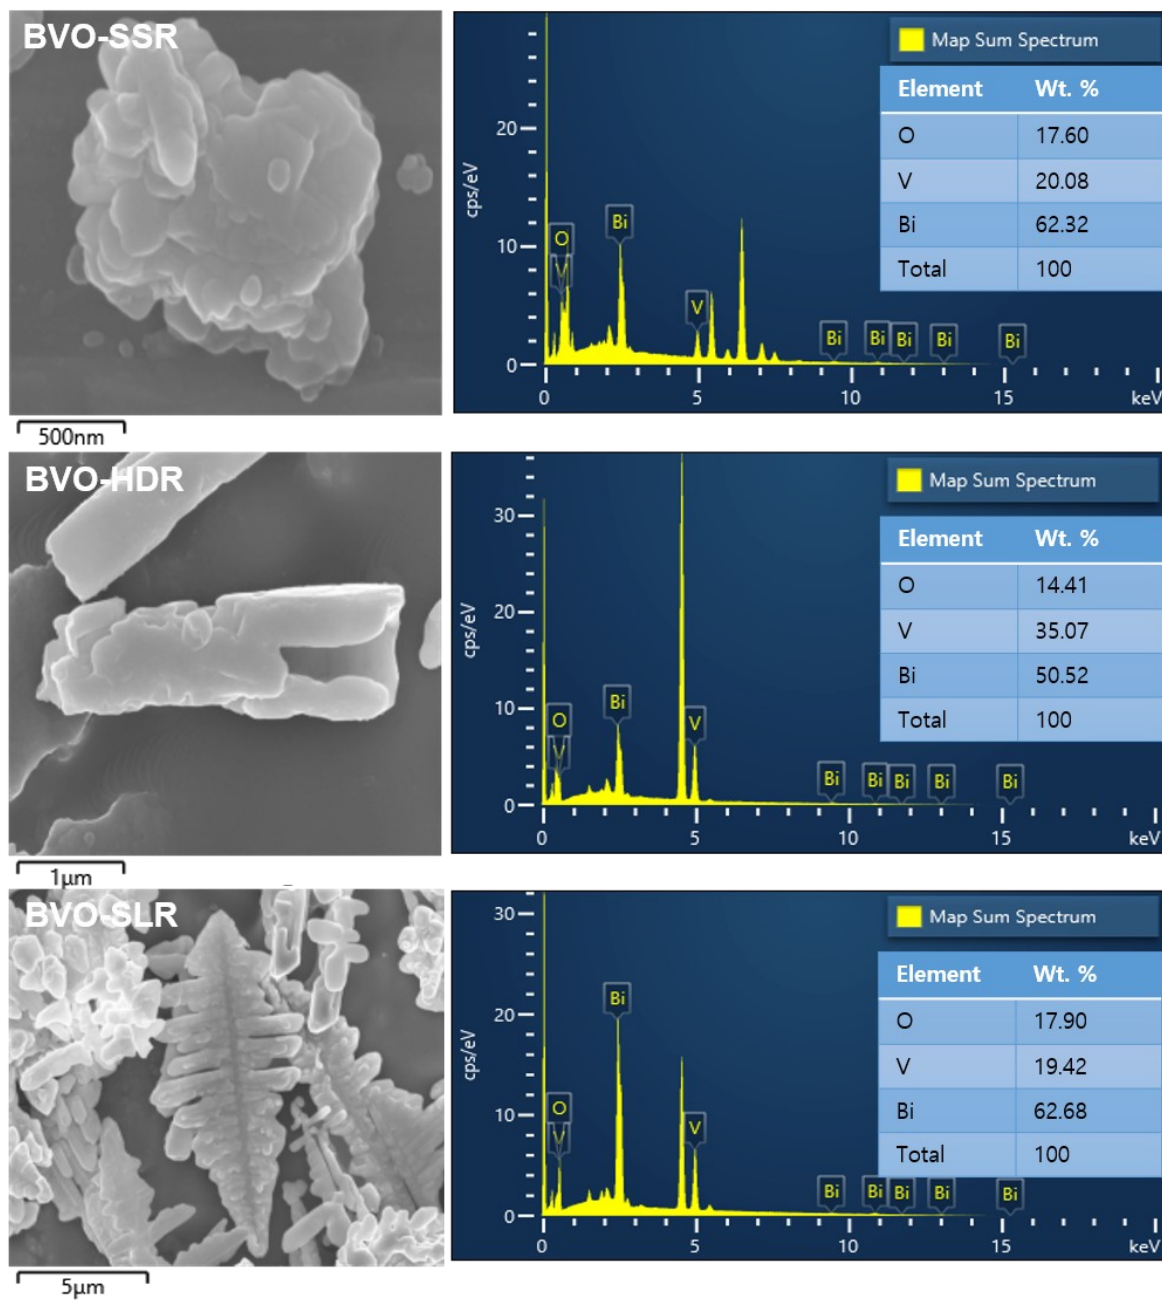

**Fig. S3.** EDS (compositional analysis) of BVO-SSR, BVO-HDR, and BVO-SLR samples prepared with different synthesis strategies.

## Supporting Information S4

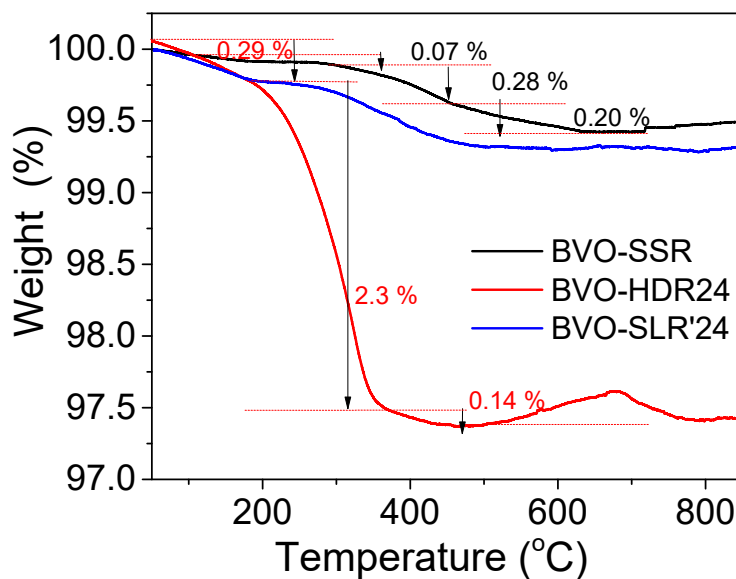

**Fig. S4** TGA curves of BVO-SSR, BVO-HDR24, and BVO-SLR'24 samples.

TGA curves were also utilized to clarify the oxygen vacancies. As illustrated in Fig.S4, the TGA curves of the catalysts BVO-SSR and BVO-SLR'24 indicate that  $\text{BiVO}_4$  decomposition proceeds in four stages at temperatures ranging from 30–100 °C to 100–270 °C, 270–550 °C, and 550–800 °C. The catalysts lost weight in the first step (30–100 °C) due to the removal of adsorbed water molecules from the surface. The second stage of weight loss for BVO-SSR was 0.07 percent, the third stage was 0.28 percent, and the final stage was 0.20 percent. Weight loss for the BVO-SSR and BVO-SLR'24 catalysts occurred between 270 and 550 °C due to phase change from tetragonal to monoclinic  $\text{BiVO}_4$ , as well as oxygen vacancies that can be filled by oxygen atoms at this temperature.<sup>1-3</sup>

## Supporting Information S5

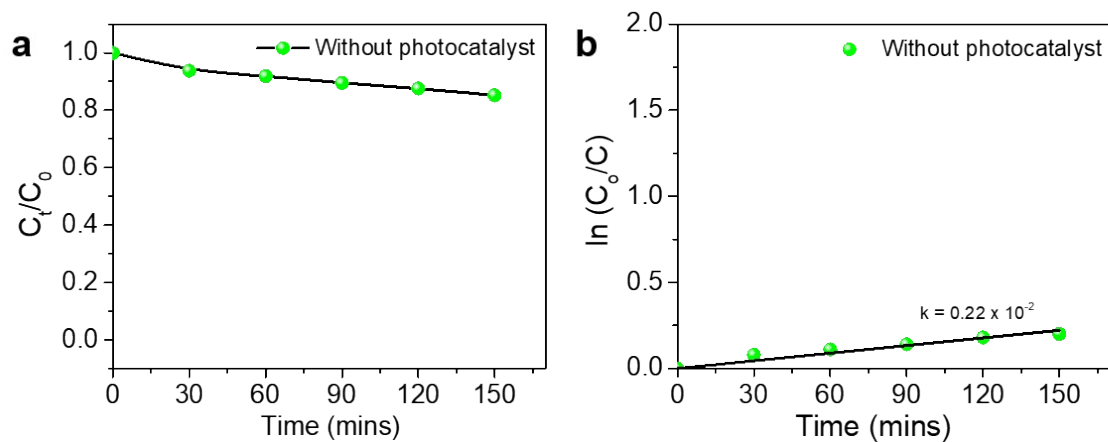

**Fig. S5.** (a) Photodegradation of MB with time during photolysis (without photocatalyst) under light irradiation and (b) corresponding kinetics of degradation studies.

**Table S1 Rate constant (*K*) of the photocatalytic MB degradation using the as-prepared photocatalyst samples.**

| Sr. No. | Catalyst   | Rate constant ( <i>K</i> ) for MB degradation [ $\text{min}^{-1}$ ] | Std. Dev. |
|---------|------------|---------------------------------------------------------------------|-----------|
| 1       | BVO-HDR 24 | $1.10 \times 10^{-2}$                                               | 0.00068   |
| 2       | BVO-SLR'24 | $3.19 \times 10^{-2}$                                               | 0.0045    |
| 3       | BVO-SLR12  | $1.46 \times 10^{-2}$                                               | 0.00043   |
| 4       | BVO-SLR24  | $1.16 \times 10^{-2}$                                               | 0.00068   |
| 5       | BVO-SLR36  | $1.62 \times 10^{-2}$                                               | 0.00048   |
| 5       | BVO-SLR 48 | $0.98 \times 10^{-2}$                                               | 0.001     |
| 6       | BVO-SSR    | $1.38 \times 10^{-2}$                                               | 0.00067   |

### Supporting Information S6

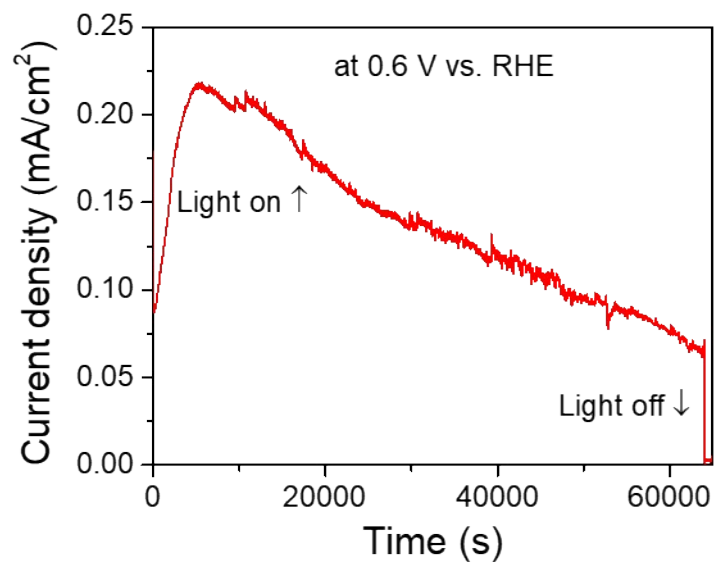

**Fig. S6.** Photocurrent density as a function of time for BVO-SLR'24 at 0.6 V versus RHE under 100 mW/cm<sup>2</sup> illumination.

#### References

- 1 S. D. Dolić, D. J. Jovanović, K. Smits, B. Babić, M. Marinović-Cincović, S. Porobić and M. D. Dramićanin, *Ceram. Int.*, 2018, **44**, 17953–17961.
- 2 S. Nikam and S. Joshi, *RSC Adv.*, 2016, **6**, 107463–107474.
- 3 A. K. Bhattacharya, K. K. Mallick and A. Hartridge, *Mater. Lett.*, 1997, **30**, 7–13.
